# Supplementary material for: Highly efficient NIR to NIR and VIS upconversion in Er3+ and Yb3+ doped in M2O2S (M = Gd, La, Y)
Source: Royal Society of Chemistry journal article supplement (doi:10.1039/c3ta12205k), 2013-01-01
Supplement: c3ta12205k.pdf [file c3ta12205k.pdf]

## Supporting Information

### Highly efficient NIR to NIR and VIS upconversion in Er<sup>3+</sup> and Yb<sup>3+</sup> doped in M<sub>2</sub>O<sub>2</sub>S (M=Gd, La, Y)

M. Pokhrel<sup>1\*</sup>, GA. Kumar<sup>1</sup>, and D. Sardar<sup>1</sup>

<sup>1</sup>Department of Physics and Astronomy, University of Texas at San Antonio, San Antonio, TX 78249

#### ESI S1. Synthesis and Characterization of NaYF<sub>4</sub>:20% Yb/2% Er

For comparison between the hosts, 3±1 μm sized β-NaYF<sub>4</sub> phosphor powder doped with 20% Yb<sup>3+</sup>/2% Er<sup>3+</sup> was synthesized using method as described in reference, which is generally accepted to give the highest quality β-NaYF<sub>4</sub>: 20% Yb<sup>3+</sup> /2% Er<sup>3+</sup> with most efficient UC emission.<sup>1</sup> Fig. S1 (a) shows the scanning transmission electron microscopy (STEM) image of the β-NaYF<sub>4</sub>: 20% Yb<sup>3+</sup> /2% Er<sup>3+</sup> phosphor. STEM image as shown in Fig. S1 (a) confirms non-uniform morphology of the particles with an average size of 3 ± 1 μm. The compositional distributions of each element in the particles were confirmed by Energy Dispersive X-ray (EDX) line and spectral mapping analysis as shown in Fig. S1 and Fig. S2. Spectral mapping was performed in a cluster of particles as shown Fig. S1 (b). Line scan spectrum was recorded through the center of a nanoparticle marked by a yellow line as shown in inset of Fig. S1 (a). EDX signals obtained from K, L, and M shell electrons were clearly traced across the region of the nanoparticles as shown in Fig. S1(c) and Fig. S1(d), which guarantees the doping of Yb<sup>3+</sup>/Er<sup>3+</sup>. The X-Ray, morphological characterizations, and optical properties of β-NaYF<sub>4</sub>: 20% Yb<sup>3+</sup>/2% Er<sup>3+</sup> were compared with the reference too.<sup>1</sup>

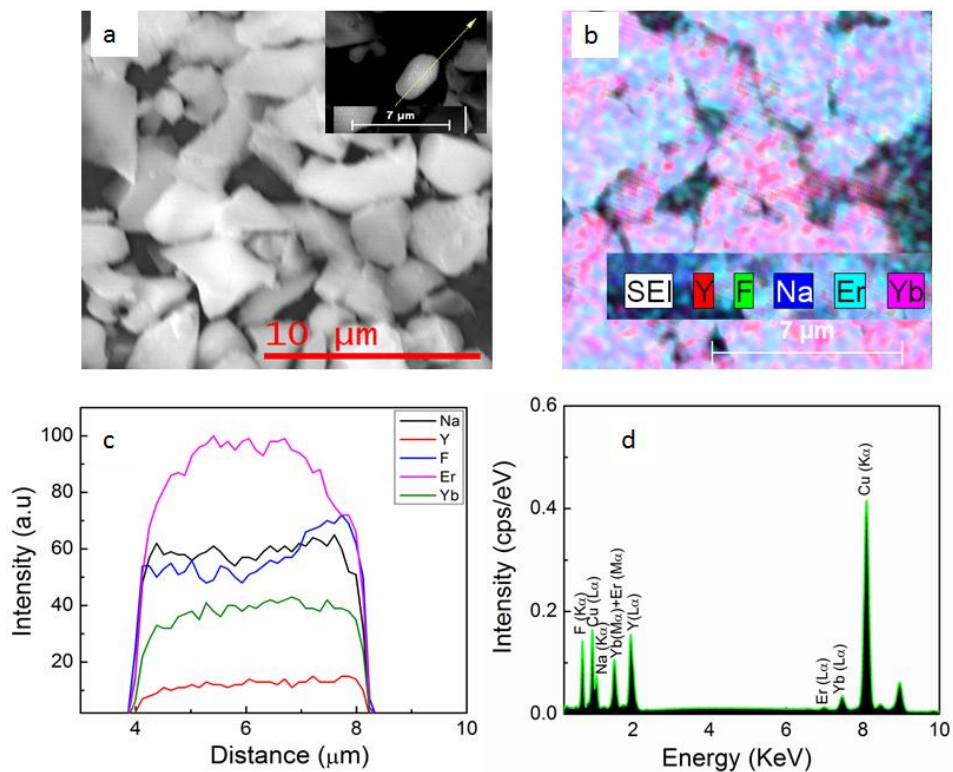

Figure S2. (a) SEM image of the NaYF<sub>4</sub>: 20 % Yb<sup>3+</sup>/ 2% Er<sup>3+</sup> phosphor synthesized through solid state reaction, inset of 1(a) shows the EDX line scan setup for NaYF<sub>4</sub>: 20 % Yb<sup>3+</sup>/ 2% Er<sup>3+</sup> particles (b) shows the EDX mapping scan of NaYF<sub>4</sub>: 20 % Yb<sup>3+</sup>/ 2% Er<sup>3+</sup> particles (c) EDX line scan spectrum confirming the doping of Er<sup>3+</sup> and Yb<sup>3+</sup>, (d) EDX spectrum confirming the doping of Yb<sup>3+</sup>/Er<sup>3+</sup> into NaYF<sub>4</sub> lattice matrix

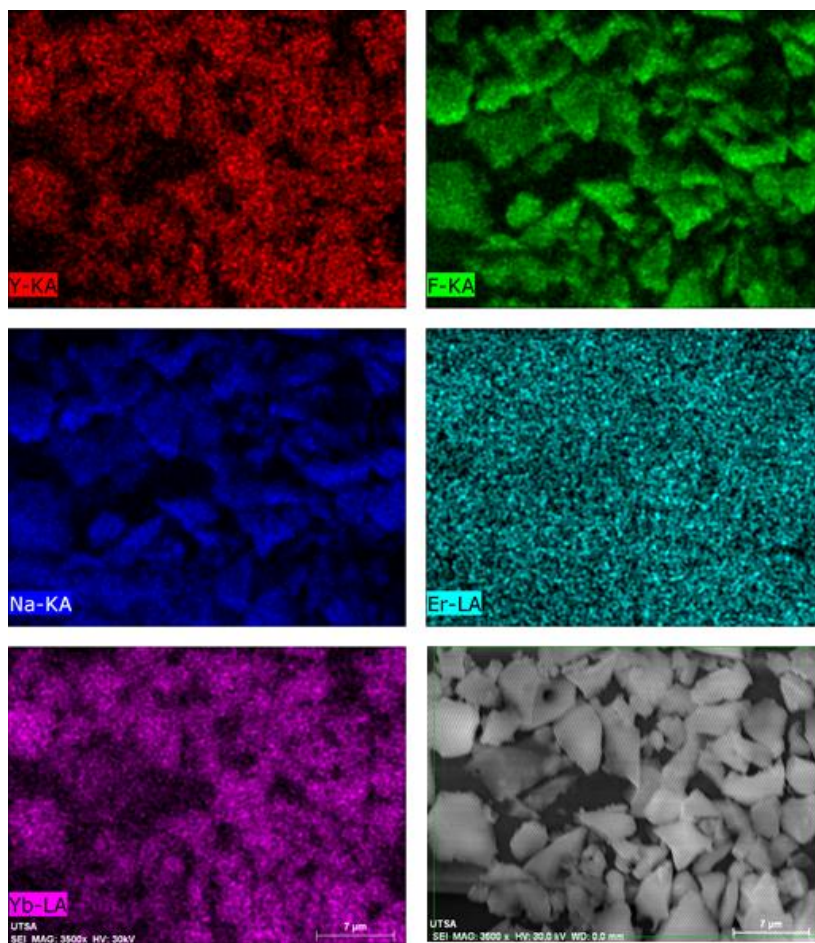

Figure S3. EDX mapping of NaYF<sub>4</sub>: 20 % Yb<sup>3+</sup>/ 2% Er<sup>3+</sup> particles confirming the doping of Er<sup>3+</sup> and Yb<sup>3+</sup>

### Upconversion Quantum Yield: $\text{La}_2\text{O}_2\text{S}:\text{Yb}^{3+}/\text{Er}^{3+}$

Table S4 Absolute UC QYs for different concentration of  $\text{La}_2\text{O}_2\text{S}:\text{Yb}^{3+}/\text{Er}^{3+}$  compared to that of  $\beta\text{-NaYF}_4:20\%\text{Yb}^{3+}/2\%\text{Er}^{3+}$  at the excitation power density of  $0.5 \pm 0.07 \text{ W/cm}^2$

| QY at $0.5 \text{ W/cm}^2(\%)$               | UV<br>(410 nm)      | Green<br>(550 nm) | Red<br>(667 nm)   | NIR<br>(822 nm)  | Total<br>(QY)%  |
|----------------------------------------------|---------------------|-------------------|-------------------|------------------|-----------------|
| 20 % Yb, 2% Er: $\text{NaYF}_4$              | $\approx 0$         | $0.030 \pm 0.005$ | $0.025 \pm 0.003$ | $0.16 \pm 0.03$  | $0.21 \pm 0.03$ |
| 9%Yb, 1% Er: $\text{La}_2\text{O}_2\text{S}$ | $0.0014 \pm 0.0002$ | $0.062 \pm 0.009$ | $0.21 \pm 0.03$   | $0.13 \pm 0.02$  | $0.40 \pm 0.06$ |
| 3%Yb, 7% Er: $\text{La}_2\text{O}_2\text{S}$ | $0.0014 \pm 0.0002$ | $0.084 \pm 0.001$ | $0.32 \pm 0.03$   | $0.29 \pm 0.02$  | $0.70 \pm 0.10$ |
| 5%Yb, 5% Er: $\text{La}_2\text{O}_2\text{S}$ | $0.0013 \pm 0.0002$ | $0.076 \pm 0.009$ | $0.19 \pm 0.03$   | $0.19 \pm 0.03$  | $0.46 \pm 0.07$ |
| 1%Yb,1%Er: $\text{La}_2\text{O}_2\text{S}$   | $0.0008 \pm 0.0001$ | $0.047 \pm 0.007$ | $0.095 \pm 0.01$  | $0.19 \pm 0.03$  | $0.33 \pm 0.05$ |
| 1%Yb, 9% Er: $\text{La}_2\text{O}_2\text{S}$ | $0.0007 \pm 0.0001$ | $0.036 \pm 0.005$ | $0.12 \pm 0.018$  | $0.29 \pm 0.044$ | $0.45 \pm 0.07$ |

Table S5 Absolute UC QYs for different concentration of  $\text{La}_2\text{O}_2\text{S}:\text{Yb}^{3+}/\text{Er}^{3+}$  compared to that of  $\beta\text{-NaYF}_4:20\%\text{Yb}^{3+}/2\%\text{Er}^{3+}$  at the excitation power density of  $3.8 \pm 0.57 \text{ W/cm}^2$

| QY at $3.8 \text{ W/cm}^2(\%)$               | UV<br>(410 nm)      | Green<br>(550 nm) | Red<br>(667 nm) | NIR<br>(822 nm) | Total<br>(QY)%  |
|----------------------------------------------|---------------------|-------------------|-----------------|-----------------|-----------------|
| 20 % Yb, 2% Er: $\text{NaYF}_4$              | $0.014 \pm 0.002$   | $0.37 \pm 0.06$   | $0.43 \pm 0.06$ | $0.86 \pm 0.13$ | $1.67 \pm 0.25$ |
| 9%Yb, 1% Er: $\text{La}_2\text{O}_2\text{S}$ | $0.020 \pm 0.003$   | $0.69 \pm 0.10$   | $3.13 \pm 0.50$ | $1.03 \pm 0.15$ | $4.87 \pm 0.73$ |
| 3%Yb, 7% Er: $\text{La}_2\text{O}_2\text{S}$ | $0.015 \pm 0.002$   | $0.56 \pm 0.10$   | $1.62 \pm 0.24$ | $2.53 \pm 0.40$ | $4.72 \pm 0.72$ |
| 5%Yb, 5% Er: $\text{La}_2\text{O}_2\text{S}$ | $0.015 \pm 0.002$   | $0.67 \pm 0.10$   | $1.88 \pm 0.3$  | $1.51 \pm 0.20$ | $4.07 \pm 0.6$  |
| 1%Yb,1%Er: $\text{La}_2\text{O}_2\text{S}$   | $0.0018 \pm 0.0003$ | $0.17 \pm 0.03$   | $0.38 \pm 0.05$ | $0.29 \pm 0.04$ | $0.84 \pm 0.12$ |
| 1%Yb, 9% Er: $\text{La}_2\text{O}_2\text{S}$ | $0.0052 \pm 0.0008$ | $0.24 \pm 0.036$  | $0.81 \pm 0.12$ | $1.35 \pm 0.20$ | $2.41 \pm 0.36$ |

Table S6. Absolute UC QY for  $\text{La}_2\text{O}_2\text{S}: 9\% \text{Yb}^{3+} / 1\% \text{Er}^{3+}$  compared to that of  $\text{NaYF}_4: 20\% \text{Yb}, 2\% \text{Er}$  at their threshold excitation power densities and at  $3.8 \pm 0.57 \text{ W/cm}^2$

| QY (%)                                                              | UV<br>(410 nm) | Green<br>(550 nm) | Red<br>(667 nm) | NIR<br>(822 nm) | Total<br>(QY)% |
|---------------------------------------------------------------------|----------------|-------------------|-----------------|-----------------|----------------|
| 20 % Yb, 2% Er: $\text{NaYF}_4$ at 22 $\text{W/cm}^2$               | 0.11±0.02      | 1.66±0.20         | 2.5±0.40        | 3.53±0.50       | 7.8±1.2        |
| 9%Yb, 1% Er: $\text{La}_2\text{O}_2\text{S}$ at 22 $\text{W/cm}^2$  | 0.0047±0.0004  | 0.57±0.08         | 1.59±0.23       | 0.50±0.07       | 2.66±0.4       |
| 20 % Yb, 2% Er: $\text{NaYF}_4$ at 13 $\text{W/cm}^2$               | 0.072±0.001    | 1.07±0.16         | 1.6±0.24        | 2.2±0.33        | 4.9 ± 0.7      |
| 9%Yb, 1% Er: $\text{La}_2\text{O}_2\text{S}$ at 13 $\text{W/cm}^2$  | 0.024±0.004    | 0.87±0.10         | 3.84±0.60       | 1.1±0.16        | 5.83±0.8       |
| 20% Yb,2% Er: $\text{NaYF}_4$ at 3.8 $\text{W/cm}^2$                | 0.014±0.002    | 0.37±0.05         | 0.43±0.06       | 0.86±0.13       | 1.67±0.3       |
| 9%Yb, 1% Er: $\text{La}_2\text{O}_2\text{S}$ at 3.8 $\text{W/cm}^2$ | 0.020±0.003    | 0.69±0.10         | 3.13±0.50       | 1.03±0.15       | 4.87± 0.7      |

### Upconversion Quantum Yield: $\text{Y}_2\text{O}_2\text{S}:\text{Yb}^{3+}/\text{Er}^{3+}$

Table S7 Absolute UC QY for different concentrations of  $\text{Y}_2\text{O}_2\text{S}: \text{Yb}^{3+} / \text{Er}^{3+}$  at the excitation power density of  $3.8 \pm 0.57 \text{ W/cm}^2$

| QY at 3.8 $\text{W/cm}^2$ (%)                                | UV<br>(410 nm) | Green<br>(550 nm) | Red<br>(667 nm) | NIR<br>(822 nm) | Total<br>(QY)% |
|--------------------------------------------------------------|----------------|-------------------|-----------------|-----------------|----------------|
| <b>2%Yb, 8% Er:<math>\text{Y}_2\text{O}_2\text{S}</math></b> | 0.001±0.0001   | 0.094±0.015       | 0.21±0.10       | 0.86±0.12       | 1.2±0.17       |
| <b>3%Yb, 7% Er:<math>\text{Y}_2\text{O}_2\text{S}</math></b> | 0.0065±0.001   | 0.15±0.023        | 0.35±0.05       | 0.76±0.11       | 1.26±0.20      |
| <b>5%Yb, 5% Er:<math>\text{Y}_2\text{O}_2\text{S}</math></b> | 0.0054±0.0008  | 0.16±0.023        | 0.41±0.06       | 0.53±0.10       | 1.10±0.16      |
| <b>0%Yb, 1% Er:<math>\text{Y}_2\text{O}_2\text{S}</math></b> | 0.0032±0.0005  | 0.087±0.015       | 0.33±0.05       | 0.78±0.11       | 1.20±0.18      |
| <b>1%Yb, 1% Er:<math>\text{Y}_2\text{O}_2\text{S}</math></b> | 0.0034±0.0005  | 0.090±0.015       | 0.12±0.021      | 0.91±0.13       | 1.12±0.16      |

### Upconversion Quantum Yield: $\text{Gd}_2\text{O}_3\text{:Yb}^{3+}/\text{Er}^{3+}$

Table S8 Absolute UC QY for different concentrations of  $\text{Gd}_2\text{O}_3\text{:Yb}^{3+}/\text{Er}^{3+}$  at the excitation power density of  $0.5 \pm 0.07 \text{ W/cm}^2$

| QY at $0.5 \text{ W/cm}^2$ (%)                 | UV<br>(410 nm) | Green<br>(550 nm) | Red<br>(667 nm) | NIR<br>(822 nm) | Total<br>(QY)% |
|------------------------------------------------|----------------|-------------------|-----------------|-----------------|----------------|
| 1 % Yb, 1% Er: $\text{Gd}_2\text{O}_3\text{S}$ | 0.0012±0.0002  | 0.050±0.007       | 0.056±0.008     | 0.10±0.002      | 0.20±0.03      |
| 9%Yb, 1% Er: $\text{Gd}_2\text{O}_3\text{S}$   | 0.0019±0.0003  | 0.072±0.009       | 0.17±0.03       | 0.15±0.02       | 0.40±0.06      |
| 3%Yb, 7% Er: $\text{Gd}_2\text{O}_3\text{S}$   | 0.0014±0.0002  | 0.079±0.01        | 0.15±0.02       | 0.23±0.03       | 0.46±0.10      |
| 2%Yb, 8% Er: $\text{Gd}_2\text{O}_3\text{S}$   | 0.0012±0.0002  | 0.064±0.009       | 0.12±0.02       | 0.23±0.03       | 0.42±0.06      |
| 5%Yb, 5% Er: $\text{Gd}_2\text{O}_3\text{S}$   | 0.0015±0.0002  | 0.083±0.01        | 0.17±0.03       | 0.22±0.03       | 0.47±0.10      |

Table S9 Absolute UC QY for different concentrations of  $\text{Gd}_2\text{O}_3\text{:Yb}^{3+}/\text{Er}^{3+}$  at the excitation power density of  $3.8 \pm 0.57 \text{ W/cm}^2$

| QY at $3.8 \text{ W/cm}^2$ (%)                 | UV<br>(410 nm) | Green<br>(550 nm) | Red<br>(667 nm) | NIR<br>(822 nm) | Total<br>(QY)% |
|------------------------------------------------|----------------|-------------------|-----------------|-----------------|----------------|
| 1 % Yb, 1% Er: $\text{Gd}_2\text{O}_3\text{S}$ | 0.0018±0.002   | 0.069±0.06        | 0.10±0.02       | 0.16±0.02       | 0.82±0.10      |
| 2%Yb, 8% Er: $\text{Gd}_2\text{O}_3\text{S}$   | 0.002±0.0003   | 0.10±0.015        | 0.18±0.10       | 0.42±0.07       | 0.70±0.10      |
| 3%Yb, 7% Er: $\text{Gd}_2\text{O}_3\text{S}$   | 0.010±0.002    | 0.46±0.07         | 0.98±0.15       | 1.23±0.20       | 2.68±0.40      |
| 5%Yb, 5% Er: $\text{Gd}_2\text{O}_3\text{S}$   | 0.005±0.0008   | 0.24±0.04         | 0.54±0.08       | 0.44±0.07       | 1.22±0.20      |

### NOTES and REFERENCES

Department of Physics and Astronomy, University of Texas at San Antonio, San Antonio, TX 78249, USA  
Corresponding author: email: [pokhrelmadhab@gmail.com](mailto:pokhrelmadhab@gmail.com)

1. K. W. Krämer, D. Biner, G. Frei, H. U. Güdel, M. P. Hehlen and S. R. Lüthi, *Chemistry of Materials*, 2004, **16**, 1244-1251.
